# Supplementary material
Source: publisher figshare collection journal article supplement (https://acs.figshare.com/ndownloader/files/21923673)

## Supporting Information

The following supporting information is available free of charge at ACS website <http://pubs.acs.org>

Title: Quantitative proteomic analysis of the slime and ventral mantle glands of the striped pyjama squid (*Sepioloidea lineolata*)

Authors: Nikeisha J. Caruana<sup>1\*</sup>, Jan M. Strugnell<sup>1,2</sup>, Julian Finn<sup>3</sup>, Pierre Faou<sup>4</sup>, Kim M. Plummer<sup>5</sup>, Ira R. Cooke<sup>4,6</sup>

<sup>1</sup> Department of Ecology, Environment and Evolution, La Trobe University, Melbourne, VIC 3086, Australia

<sup>2</sup> Centre for Sustainable Tropical Fisheries and Aquaculture, James Cook University, Townsville, QLD 4811, Australia

<sup>3</sup> Sciences, Museums Victoria, Carlton, VIC 3053, Australia

<sup>4</sup> Department of Biochemistry and Genetics, La Trobe Institute for Molecular Science, La Trobe University, Melbourne, VIC 3086, Australia

<sup>5</sup> Department of Animal, Plant and Soil Sciences, AgriBio, La Trobe University, Melbourne, VIC 3086, Australia

<sup>6</sup> Department of Molecular and Cell Biology, James Cook University, Townsville, QLD 4811, Australia

Corresponding author: [njcaruana@students.latrobe.edu.au](mailto:njcaruana@students.latrobe.edu.au)

## Table of Contents

S-1 – Supplementary Figure 1: Heatmap of all differentially expressed proteins.

S-2 – Supplementary Table 1: Top 28 most positively differentially expressed proteins within the slime and ventral mantle glands and also negatively differentially expressed proteins in mantle muscle of *So. lineolata*

S-3 – Supplementary Figure 2: TopGO analysis of significant proteins differentially expressed proteins.

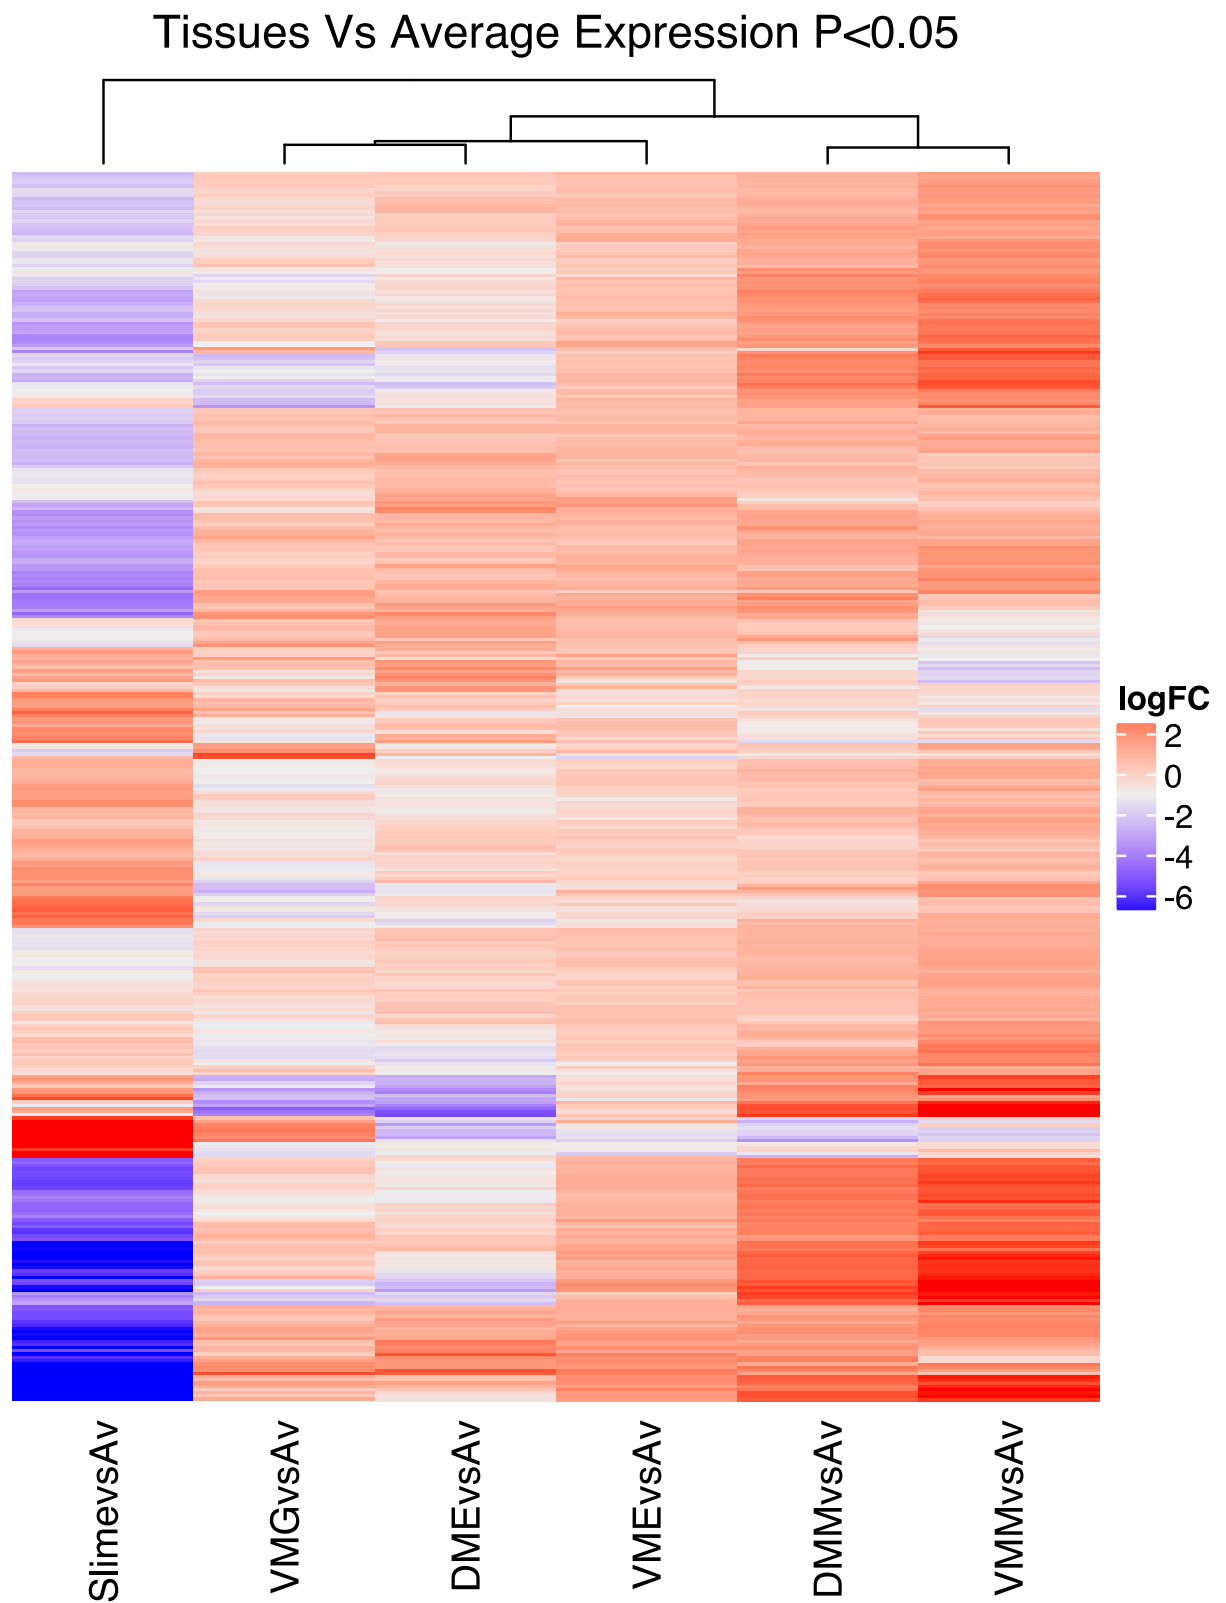

Supplementary Figure 1 - Heatmap of all differentially expressed proteins in all tissues vs average expression (normalized LogFC  $P < 0.05$ ). Tissues are SLIME – slime, VMG - ventral mantle gland, DME – dorsal mantle epithelium, DMM – dorsal mantle muscle, VME – ventral mantle epithelium, VMM – ventral mantle muscle.

Supplementary Table 1 – Top 28 most positively differentially expressed proteins within the slime and ventral mantle glands and negatively differentially expressed proteins in the mantle muscle of *S. lineolata*. ID's are given according to protein groups found in the proteingroups.txt file from *MaxQuant*. Log2 expression values from left to right – SlimevsAv – Slime compared to the average expression of all tissues and slime, VMEvsAv – ventral mantle epithelium compared to the average expression of all tissues and slime, VMGvsAv – ventral mantle gland compared to the average expression of all tissues and slime, DMMvsAv – Dorsal mantle muscle compared to the average expression of all tissues and slime, DMEvsAv - dorsal mantle epithelium compared to the average expression of all tissues and slime, ventral mantle muscle compared to the average expression of all tissues and slime.

S-2

| Protein ID | blastx                                                            | blastx Evalue | Pfam                                                                              | Pfam Evalue | Signal Peptide | Start Codon | Stop Codon | SlimevsAv  | VMEvsAv    | VMGvsAv    | DMMvsAv    | DMEvsAv    | VMMvsAv    |
|------------|-------------------------------------------------------------------|---------------|-----------------------------------------------------------------------------------|-------------|----------------|-------------|------------|------------|------------|------------|------------|------------|------------|
| SL_1911    | NA                                                                | NA            | NA                                                                                | NA          | *              | N           | Y          | 6.63826455 | -1.3979665 | 1.71972085 | -2.3673047 | -2.8852292 | -1.7074851 |
| SL_160     | Fatty acid-binding protein, heart                                 | E:9e-24       | Lipocalin_7                                                                       | E:3.2e-10   |                | N           | Y          | 6.33336136 | -1.9657544 | -1.5867874 | -1.2252047 | -1.190557  | -0.3650579 |
| SL_493     | Carboxypeptidase E                                                | E:5e-136      | Peptidase_M14                                                                     | E:1.7e-80   | *              | Y           | Y          | 6.08499841 | -1.8932907 | 2.37687191 | -3.3434766 | -1.4311573 | -1.7939457 |
| SL_923     | Neuroendocrine convertase 1                                       | E:0           | PeptidaseS8 pro-domain                                                            | E:6.2e-20   |                | Y           | Y          | 5.81215663 | -1.5026746 | 2.01090697 | -1.7740836 | -2.404494  | -2.1418114 |
| SL_414     | NA                                                                | NA            | HSP20                                                                             | E:0.00015   | *              | Y           | Y          | 5.10578407 | -1.4093451 | 2.17746834 | -1.7087931 | -2.3822714 | -1.7828428 |
| SL_1292    | NA                                                                | NA            | NA                                                                                | NA          |                | N           | Y          | 4.74840269 | 0.40262369 | -1.5710456 | -2.5168473 | -0.4377225 | -0.625411  |
| SL_1553    | NA                                                                | NA            | ETX_MTX2^Clostridium epsilon toxin<br>ETX/Bacillus<br>mosquitocidal toxin<br>MTX2 | E:1.6e-05   |                | Y           | Y          | 4.45286527 | -0.9655027 | -1.2456214 | -0.8696777 | -0.8344995 | -0.5375639 |
| SL_2089    | NA                                                                | NA            | NA                                                                                | NA          |                | N           | N          | 4.17356979 | 0.9470107  | -1.2882731 | 0.4795999  | -0.9717695 | 0.4869167  |
| SL_1927    | SUMO-activating enzyme subunit 2                                  | E:1e-58       | ThiF family                                                                       | E:2.3e-07   |                | N           | Y          | 4.15433318 | 0.7370802  | 1.15612374 | -2.5995135 | -1.8133093 | -1.6347143 |
| SL_800     | WSC domain-containing protein 2                                   | E:7e-10       | WSC domain                                                                        | E:3.3e-09   | *              | N           | Y          | 4.10691703 | -0.8303382 | 2.01301768 | -1.5024367 | -1.8829891 | -1.9041706 |
| SL_1815    | Angiotensin-converting enzyme                                     | E:2e-165      | Angiotensin-converting enzyme                                                     | E:3.3e-206  |                | N           | Y          | 4.00296016 | -0.8224672 | 1.98219245 | -1.8558635 | -3.0885459 | -0.218276  |
| SL_1377    | NA                                                                | NA            | NA                                                                                | NA          | *              | Y           | N          | 3.4956952  | -0.3688516 | 0.22012101 | -1.735118  | -1.3778019 | 0.2340447  |
| SL_229     | Profilin-1B                                                       | E:1e-10       | Profilin                                                                          | E:4.1e-19   |                | Y           | Y          | 2.77957831 | -0.6837999 | 0.13834463 | -0.0653487 | -1.3403157 | -0.8284586 |
| SL_1908    | C3 and P2P-like alpha 2-macroglobulin domain-containing protein 8 | E:5e-08       | Farnesic acid O-methyl transferase                                                | E:7.7e-16   |                | Y           | Y          | 2.51863674 | 0.28205    | -0.8692736 | -1.634967  | 1.31072012 | -1.6071663 |
| SL_804     | CD63 antigen                                                      | E:4e-29       | Tetraspanin family                                                                | E:2.2e-49   |                | Y           | Y          | 2.06071846 | -1.3774173 | 0.78583225 | -0.2915525 | -0.8866001 | -0.2909808 |
| SL_1814    | Synaptic vesicle membrane protein VAMP-1 homolog-like             | E:5e-146      | Alcohol dehydrogenase GroES-like domain                                           | E:2.2e-12   | *              | N           | Y          | 2.0419749  | -0.6588568 | 1.02551277 | 0.8284292  | -0.1052436 | -1.4749581 |
| SL_312     | NA                                                                | E:9e-111      | SPFH domain / Band 7 family                                                       | E:1.9e-32   |                | Y           | Y          | 2.01505506 | -0.6399294 | -0.3129034 | -0.3076079 | -0.2596822 | -0.4949322 |
| SL_1986    | Universal stress protein in OAH/OAS sulphydrylase 3'region        | E:5e-09       | Universal stress protein family                                                   | E:1.7e-29   |                | Y           | Y          | 2.00839405 | -0.4761407 | -0.5643122 | -0.3614787 | 0.23992042 | -0.8463828 |
| SL_958     | D-beta-hydroxybutyrate dehydrogenase, mitochondrial               | E:6e-75       | Short chain dehydrogenase                                                         | E:1.2e-40   |                | Y           | Y          | 1.8638006  | 0.35743361 | -0.7622823 | -1.010149  | 0.31059586 | -0.7593988 |
| SL_1885    | von Willebrand factor A domain-containing protein 5A              | E:9e-105      | Vault protein inter-alpha-trypsin domain                                          | E:2e-07     |                | Y           | Y          | 1.69984097 | 0.00626999 | -1.2483245 | -0.6477244 | 0.81325625 | -0.6233183 |
| SL_640     | Annexin A7                                                        | E:4e-112      | Annexin                                                                           | E:3.5e-25   |                | Y           | Y          | 1.59465761 | -0.2928906 | -0.9488367 | -0.2587616 | -0.0540772 | -0.0400915 |
| SL_504     | Calmodulin-2                                                      | E:2e-12       | EF-hand_7                                                                         | E:4.4e-11   |                | Y           | Y          | 1.45246272 | -0.6933099 | 0.55646347 | -0.495039  | -0.2381123 | -0.582465  |
| SL_2116    | Protocadherin Fat 4                                               | E:7e-171      | Cadherin                                                                          | E:4.9e-11   |                | Y           | Y          | 1.40390751 | -0.7721791 | 0.37259794 | -0.105102  | 1.4308388  | -2.3300631 |
| SL_1095    | Ras-related protein Rab-1A                                        | E:3e-86       | Ras family                                                                        | E:1.6e-37   |                | N           | Y          | 1.27719867 | 0.05886675 | -0.2185485 | -0.4267997 | 0.03179483 | -0.7225121 |
| SL_1362    | Caspase-7                                                         | E:5e-67       | Peptidase_C14                                                                     | E:6.3e-47   |                | Y           | Y          | 1.23372436 | -0.2749376 | 0.33995907 | -0.3978749 | -0.022267  | -0.8786039 |
| SL_480     | Glutaredoxin-1                                                    | E:2e-10       | Glutaredoxin                                                                      | E:1.1e-13   | *              | Y           | Y          | 1.23112679 | 0.47523734 | -0.6491431 | -0.4220695 | 1.14896342 | -1.7841149 |
| SL_557     | Annexin A4                                                        | E:3e-86       | Annexin                                                                           | E:2e-191    |                | Y           | Y          | 1.19311619 | -1.1557651 | 0.53871876 | -0.5720473 | 0.3133798  | -0.3174023 |
| SL_1664    | Major vault protein                                               | E:0           | Major Vault Protein repeat                                                        | E:3.3e-13   |                | Y           | Y          | 1.11787584 | 0.43568111 | 0.22508153 | -1.0601572 | 1.42213828 | -2.1406196 |

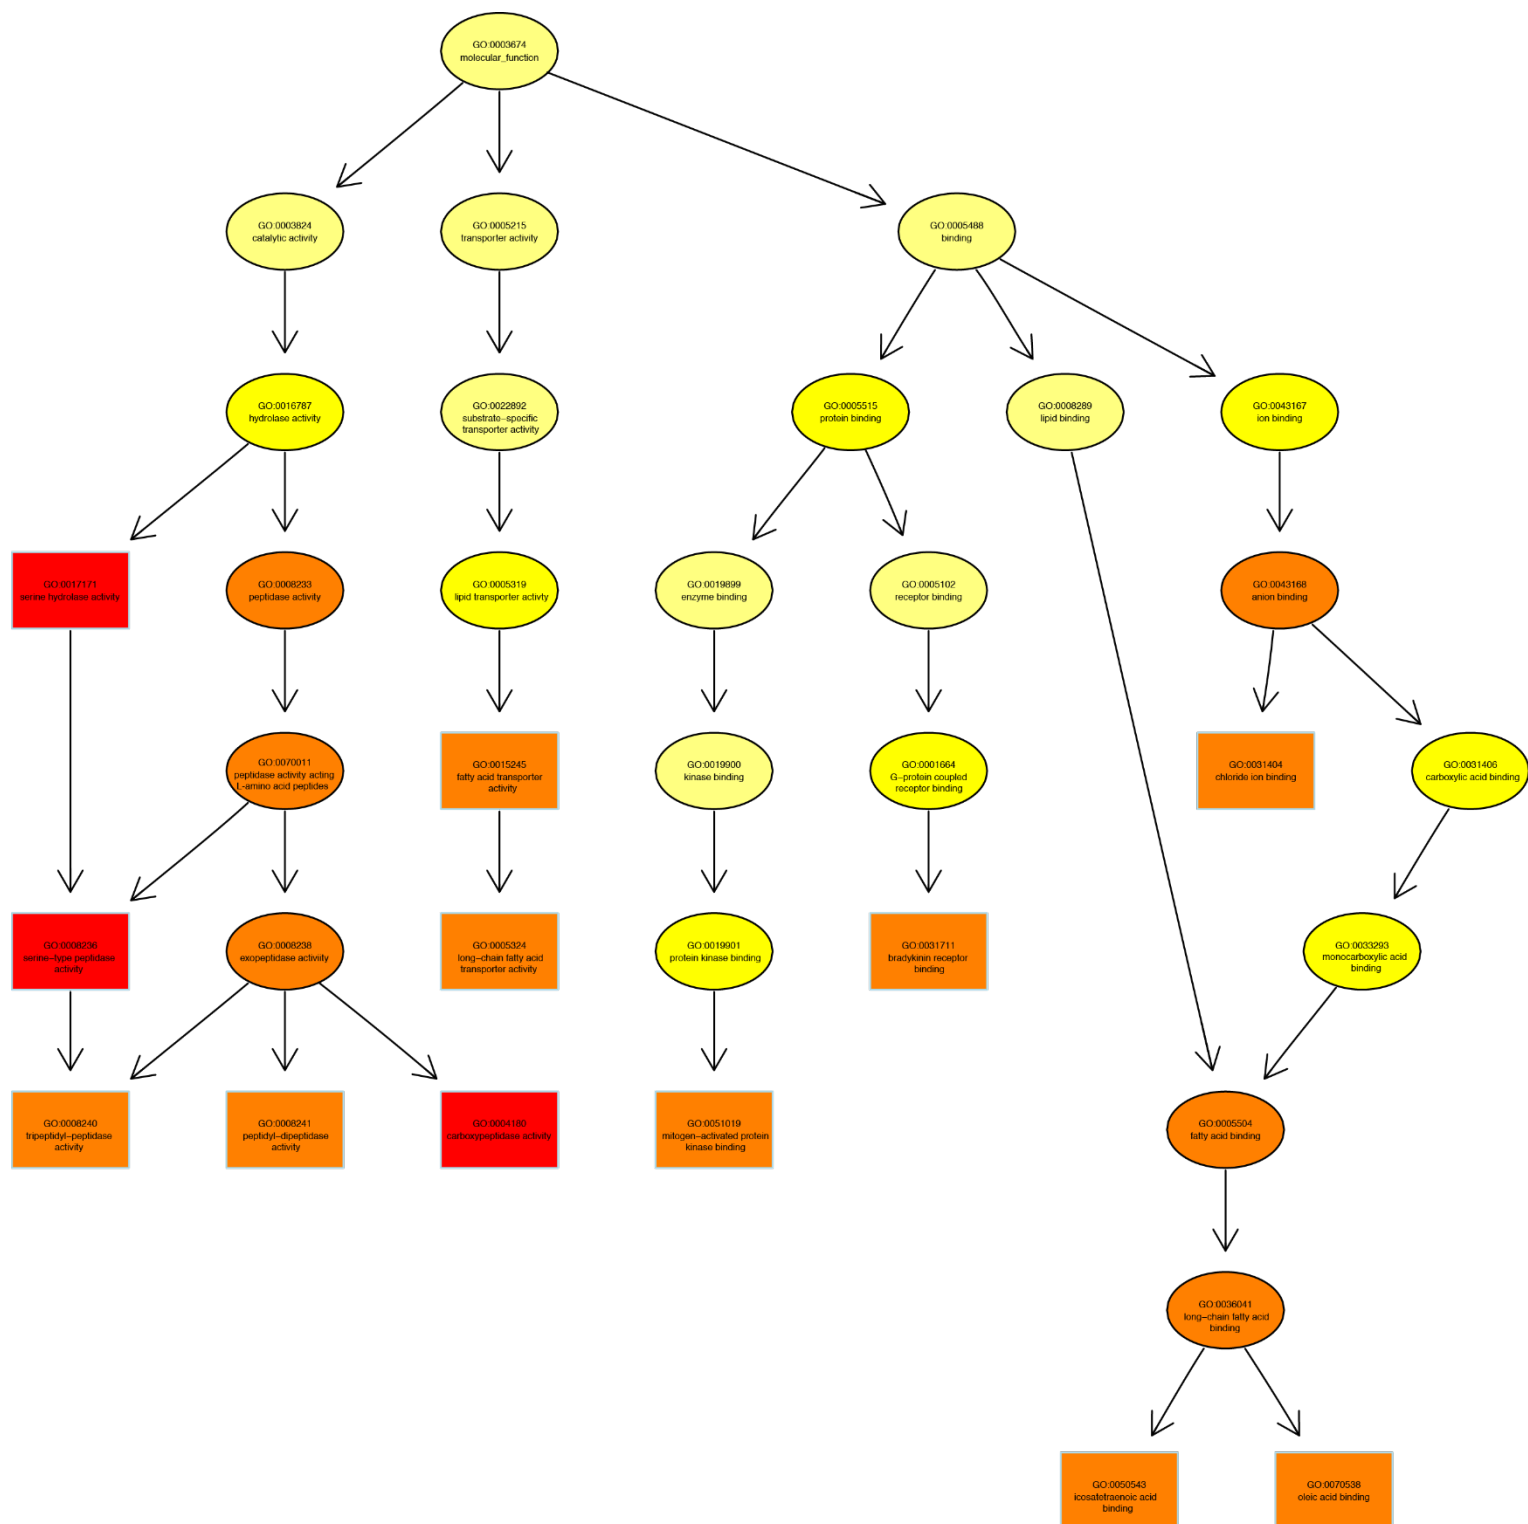

Supplement: Supplementary file 1 [file 21923673]
